# Supplementary material for: The prebiotic effects of soluble dietary fiber mixture on renal anemia and the gut microbiota in end-stage renal disease patients on maintenance hemodialysis: a prospective, randomized, placebo-controlled study
Source: Springer Nature journal article supplement (doi:10.1186/s12967-022-03812-x), 2022-12-14

# Genus

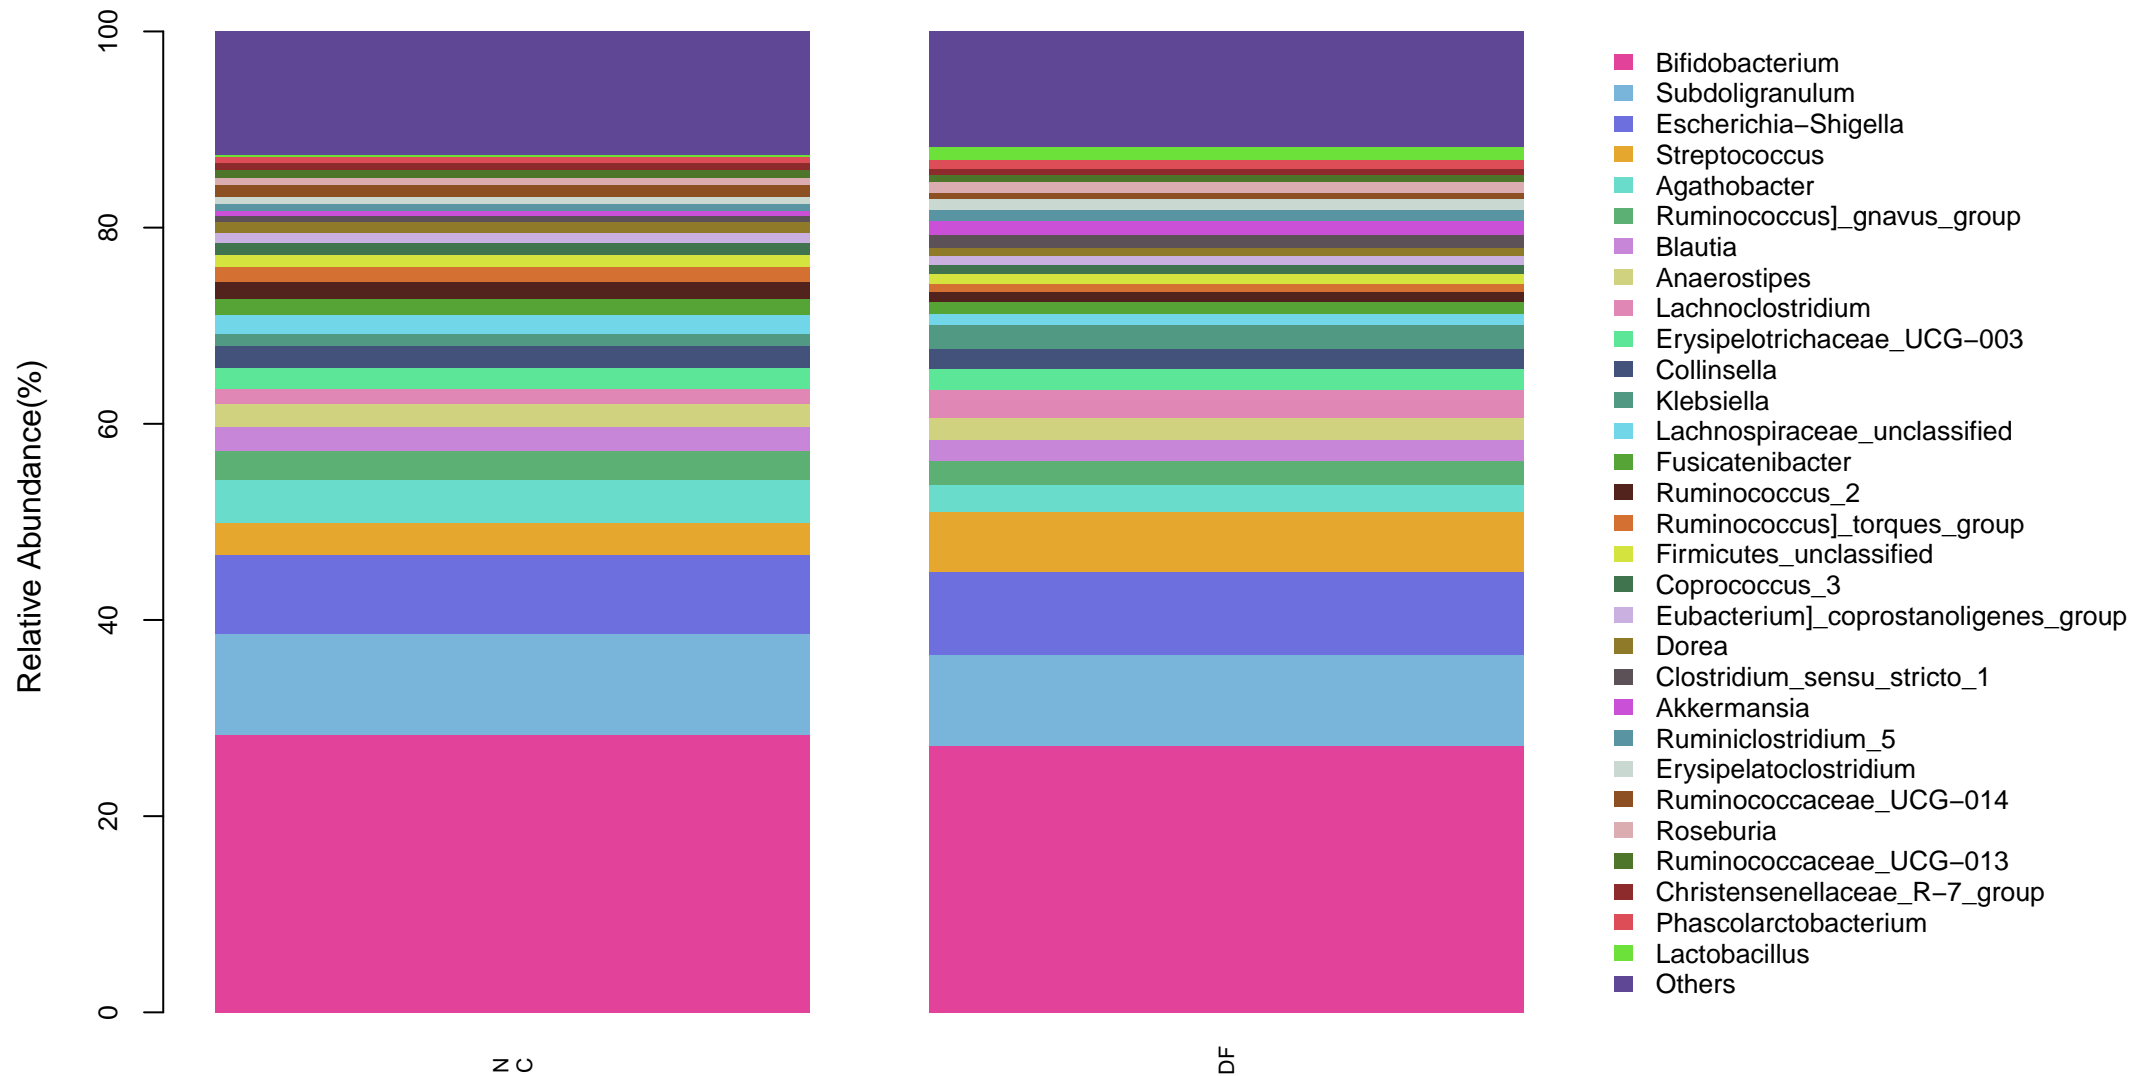

Supplement: MOESM2 [file 23826374]
